# Supplementary material for: Correlation Between Changes in Brand-Name Drug Prices and Patient Out-of-Pocket Costs
Source: PubMed Central journal article supplement (PMC8097497; doi:10.1001/jamanetworkopen.2021.8816), 2021-05-04
Supplement: jamanetwopen-e218816-s001.pdf [file jamanetwopen-e218816-s001.pdf]

## Supplementary Online Content

Rome BN, Feldman WB, Desai RJ, Kesselheim AS. Correlation between changes in brand-name drug prices and patient out-of-pocket costs. *JAMA Netw Open*. 2021;4(5):e218816. doi:10.1001/jamanetworkopen.2021.8816

**eFigure 1.** Drugs in Cohort and Reasons for Exclusion

**eTable 1.** Drugs Included in Cohort

**eTable 2.** Changes in Out-of-Pocket Spending and Correlation With Changes in Drug Prices, Unweighted

**eTable 3.** Drug Prices and Out-of-Pocket Spending, Excluding Drugs With Higher Net Than List Price Estimates in Any Quarter

**eTable 4.** Changes in Out-of-Pocket Spending and Correlation With Changes in Drug Prices, Excluding Drugs With Higher Net Than List Price Estimates in Any Quarter

**eFigure 2.** Correlation Between Drug Prices and Out-of-Pocket Spending, by High Deductible Insurance Plan

**eFigure 3.** Correlation Between Drug Prices and Out-of-Pocket Spending, by Deductible

**eFigure 4.** Correlation Between Drug Prices and Out-of-Pocket Spending, by Coinsurance

This supplementary material has been provided by the authors to give readers additional information about their work.

**eFigure 1: Drugs in Cohort and Reasons for Exclusion**

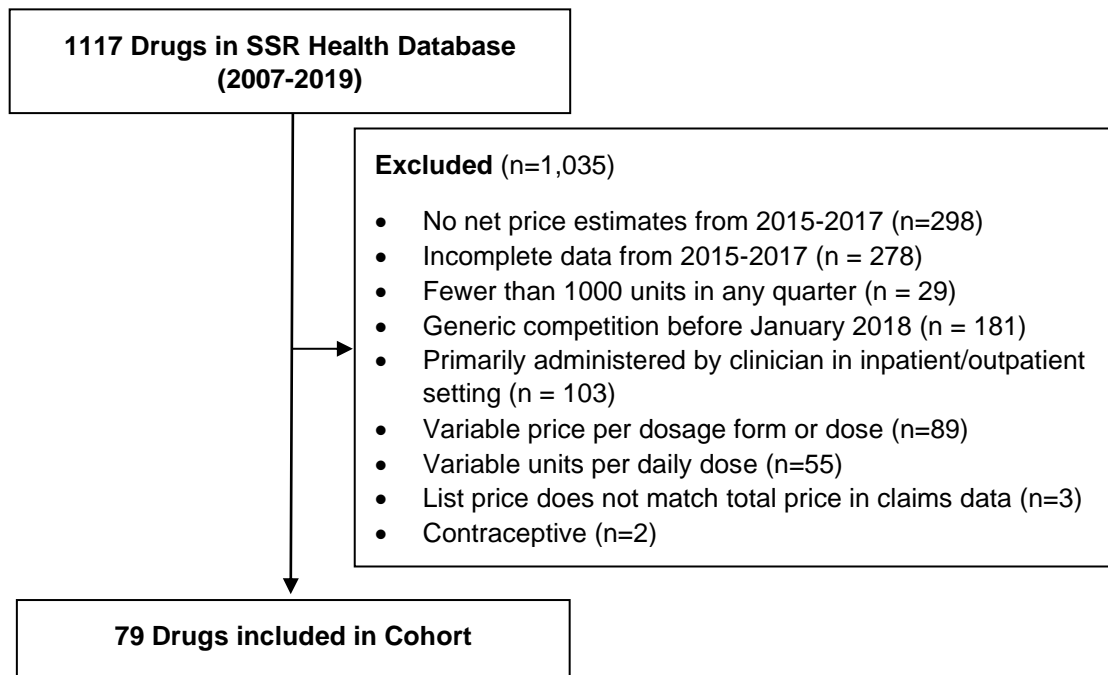

**eTable 1: Drugs included in Cohort**

| <b>Generic Name</b>                                | <b>Brand Name</b> | <b>Route of Administration</b> | <b>Therapeutic Category</b> | <b>US 30-Day Supplies, 2015 and 2017 (Thousands)</b> |
|----------------------------------------------------|-------------------|--------------------------------|-----------------------------|------------------------------------------------------|
| Sitagliptin                                        | Januvia           | Oral                           | Endocrine / Diabetes        | 28,446                                               |
| Lisdexamfetamine                                   | Vyvanse           | Oral                           | Psychiatric                 | 24,002                                               |
| Rivaroxaban                                        | Xarelto           | Oral                           | Cardiovascular              | 20,906                                               |
| Nebivolol                                          | Bystolic          | Oral                           | Cardiovascular              | 19,192                                               |
| Apixaban                                           | Eliquis           | Oral                           | Cardiovascular              | 17,151                                               |
| Dexlansoprazole                                    | Dexilant          | Oral                           | Gastrointestinal            | 11,400                                               |
| Solifenacin                                        | Vesicare          | Oral                           | Genitourinary               | 7,910                                                |
| Adalimumab                                         | Humira            | Injection                      | Other                       | 7,036                                                |
| Linagliptin                                        | Tradjenta         | Oral                           | Endocrine / Diabetes        | 6,999                                                |
| Linaclotide                                        | Linzess           | Oral                           | Gastrointestinal            | 6,037                                                |
| Mirabegron                                         | Myrbetriq         | Oral                           | Genitourinary               | 5,582                                                |
| Emtricitabine, Tenofovir                           | Truvada           | Oral                           | Antimicrobial               | 4,540                                                |
| Dulaglutide                                        | Trulicity         | Injection                      | Endocrine / Diabetes        | 4,512                                                |
| Memantine                                          | Namenda XR        | Oral                           | Neurologic                  | 4,466                                                |
| Empagliflozin                                      | Jardiance         | Oral                           | Endocrine / Diabetes        | 4,310                                                |
| Febuxostat                                         | Uloric            | Oral                           | Musculoskeletal             | 3,852                                                |
| Ticagrelor                                         | Brilinta          | Oral                           | Cardiovascular              | 3,572                                                |
| Vilazodone                                         | Viibryd           | Oral                           | Psychiatric                 | 3,367                                                |
| Saxagliptin                                        | Onglyza           | Oral                           | Endocrine / Diabetes        | 3,355                                                |
| Lubiprostone                                       | Amitiza           | Oral                           | Gastrointestinal            | 2,886                                                |
| Vortioxetine                                       | Trintellix        | Oral                           | Psychiatric                 | 2,855                                                |
| Silodosin                                          | Rapaflo           | Oral                           | Genitourinary               | 2,298                                                |
| Efavirenz, Emtricitabine, Tenofovir                | Atripla           | Oral                           | Antimicrobial               | 2,263                                                |
| Umeclidinium, Vilanterol                           | Anoro Ellipta     | Inhalation                     | Respiratory                 | 2,244                                                |
| Fesoterodine                                       | Toviaz            | Oral                           | Genitourinary               | 1,820                                                |
| Dronedarone                                        | Multaq            | Oral                           | Cardiovascular              | 1,793                                                |
| Polyethylene glycol 3350, Electrolytes             | Moviprep          | Oral                           | Gastrointestinal            | 1,739                                                |
| Abacavir, Dolutegravir, Lamivudine                 | Triumeq           | Oral                           | Antimicrobial               | 1,547                                                |
| Roflumilast                                        | Daliresp          | Oral                           | Respiratory                 | 1,360                                                |
| Elvitegravir, Cobicistat, Emtricitabine, Tenofovir | Stribild          | Oral                           | Antimicrobial               | 1,265                                                |
| Mesalamine                                         | Apriso            | Oral                           | Gastrointestinal            | 1,259                                                |
| Milnacipran                                        | Savella           | Oral                           | Musculoskeletal             | 1,148                                                |
| Ibuprofen, Famotidine                              | Duexis            | Oral                           | Musculoskeletal             | 1,140                                                |
| Dimethyl Fumarate                                  | Tecfidera         | Oral                           | Neurologic                  | 1,100                                                |
| Teriparatide                                       | Forteo            | Injection                      | Endocrine / Diabetes        | 998                                                  |
| Emtricitabine, Rilpivirine, Tenofovir              | Complera          | Oral                           | Antimicrobial               | 870                                                  |
| Levomilnacipran                                    | Fetzima           | Oral                           | Psychiatric                 | 808                                                  |
| Albiglutide                                        | Tanzeum           | Injection                      | Endocrine / Diabetes        | 786                                                  |
| Naproxen, Esomeprazole                             | Vimovo            | Oral                           | Musculoskeletal             | 781                                                  |
| Ledipasvir, Sofosbuvir                             | Harvoni           | Oral                           | Antimicrobial               | 682                                                  |
| Empagliflozin, Linagliptin                         | Glyxambi          | Oral                           | Endocrine / Diabetes        | 595                                                  |
| Fingolimod                                         | Gilenya           | Oral                           | Neurologic                  | 564                                                  |
| Mesalamine                                         | Canasa            | Rectal                         | Gastrointestinal            | 564                                                  |
| Pegfilgrastim                                      | Neulasta          | Injection                      | Oncology                    | 552                                                  |

| <b>Generic Name</b>                              | <b>Brand Name</b> | <b>Route of Administration</b> | <b>Therapeutic Category</b> | <b>US 30-Day Supplies, 2015 and 2017 (Thousands)</b> |
|--------------------------------------------------|-------------------|--------------------------------|-----------------------------|------------------------------------------------------|
| Asenapine                                        | Saphris           | Oral                           | Psychiatric                 | 524                                                  |
| Dalfampridine                                    | Ampyra            | Oral                           | Neurologic                  | 523                                                  |
| Arformoterol                                     | Brovana           | Inhalation                     | Respiratory                 | 513                                                  |
| Fosfomycin Tromethamine                          | Monurol           | Oral                           | Antimicrobial               | 475                                                  |
| Rotigotine                                       | Neupro            | Topical                        | Neurologic                  | 463                                                  |
| Dornase Alfa                                     | Pulmozyme         | Inhaled                        | Respiratory                 | 387                                                  |
| Choriogonadotropin Alfa                          | Ovidrel           | Injection                      | Endocrine / Diabetes        | 361                                                  |
| Dextromethorphan, Quinidine                      | Nuedexta          | Oral                           | Neurologic                  | 355                                                  |
| Teriflunomide                                    | Aubagio           | Oral                           | Neurologic                  | 342                                                  |
| Palbociclib                                      | Ibrance           | Oral                           | Oncology                    | 311                                                  |
| Enzalutamide                                     | Xtandi            | Oral                           | Oncology                    | 290                                                  |
| Nilotinib                                        | Tasigna           | Oral                           | Oncology                    | 259                                                  |
| Interferon Beta-1B                               | Betaseron         | Injection                      | Neurologic                  | 190                                                  |
| Tadalafil                                        | Adcirca           | Oral                           | Genitourinary               | 167                                                  |
| Ambrisentan                                      | Letairis          | Oral                           | Cardiovascular              | 162                                                  |
| Rilpivirin                                       | Edurant           | Oral                           | Antimicrobial               | 142                                                  |
| Pazopanib                                        | Votrient          | Oral                           | Oncology                    | 140                                                  |
| Sofosbuvir                                       | Sovaldi           | Oral                           | Antimicrobial               | 129                                                  |
| Vitamin B Complex, Folic Acid, Vitamin C, Biotin | Nephro-Vite Rx    | Oral                           | Other                       | 122                                                  |
| Sodium Phosphate                                 | Osmoprep          | Oral                           | Gastrointestinal            | 116                                                  |
| Pomalidomide                                     | Pomalyst          | Oral                           | Oncology                    | 110                                                  |
| Bismuth, Metronidazole, Tetracycline             | Pylera            | Oral                           | Gastrointestinal            | 91                                                   |
| Macitentan                                       | Opsumit           | Oral                           | Cardiovascular              | 84                                                   |
| Diclofenac                                       | Zipsor            | Oral                           | Musculoskeletal             | 80                                                   |
| Ruxolitinib                                      | Jakafi            | Oral                           | Oncology                    | 49                                                   |
| Oxybutynin                                       | Oxytrol           | Topical                        | Genitourinary               | 47                                                   |
| Peginterferon Beta-1A                            | Plegridy          | Injection                      | Neurologic                  | 45                                                   |
| Crizotinib                                       | Xalkori           | Oral                           | Oncology                    | 45                                                   |
| Hydroxypropyl Cellulose                          | Lacrisert         | Ophthalmic                     | Other                       | 44                                                   |
| Ivacaftor                                        | Kalydeco          | Oral                           | Respiratory                 | 31                                                   |
| Ponatinib                                        | Iclusig           | Oral                           | Oncology                    | 29                                                   |
| Sorafenib                                        | Nexavar           | Oral                           | Oncology                    | 27                                                   |
| Bosentan                                         | Tracleer          | Oral                           | Cardiovascular              | 23                                                   |
| Regorafenib                                      | Stivarga          | Oral                           | Oncology                    | 18                                                   |
| Eliglustat Tartrate                              | Cerdelga          | Oral                           | Other                       | 8                                                    |

**Legend:** The table lists all 79 drugs included in the analysis. The route of administration and therapeutic category, based on the drug's label, are shown for each drug. The drugs are sorted in decreasing order of use (final column), defined as the number of 30-day supplies dispensed in the US in 2015 and 2017. This utilization figure was used to weight drugs in the main analysis.

**eTable 2: Changes in Out-of-Pocket Spending and Correlation with changes in Drug Prices, Unweighted**

| Subgroup                             | 2015         |                            | 2017         |                            | Percent Change in OOP Spending, 2015 to 2017, Median (IQR) | Correlation with Change in List Price |              | Correlation with Change in Net Price |         |
|--------------------------------------|--------------|----------------------------|--------------|----------------------------|------------------------------------------------------------|---------------------------------------|--------------|--------------------------------------|---------|
|                                      | Patients (%) | OOP Spending; Median (IQR) | Patients (%) | OOP Spending; Median (IQR) |                                                            | r                                     | P-value      | r                                    | P-Value |
| <b>All Patients</b>                  | 100          | 36 (31, 47)                | 100          | 40 (30, 50)                | 4.9 (-3.3, 14.7)                                           | 0.07                                  | 0.56         | -0.08                                | 0.47    |
| <b>High Deductible Plan*</b>         |              |                            |              |                            |                                                            |                                       |              |                                      |         |
| Yes                                  | 12.7         | 62 (49, 83)                | 16.7         | 65 (51, 100)               | 7.8 (-5.6, 26.6)                                           | 0.17                                  | 0.13         | -0.10                                | 0.41    |
| No                                   | 87.3         | 36 (28, 45)                | 83.3         | 35 (29, 47)                | 2.9 (-3.3, 10.5)                                           | 0.02                                  | 0.89         | -0.16                                | 0.15    |
| <b>Any Drug Deductible</b>           |              |                            |              |                            |                                                            |                                       |              |                                      |         |
| Yes                                  | 23.3         | 59 (48, 92)                | 24.5         | 75 (47, 125)               | 18.3 (3.3, 5.2)                                            | 0.05                                  | 0.69         | -0.01                                | 0.93    |
| No                                   | 76.7         | 31 (26, 41)                | 75.5         | 33 (27, 45)                | <b>2.9 (-3.3, 14.3)</b>                                    | -0.05                                 | 0.69         | -0.08                                | 0.47    |
| <b>Any Coinsurance</b>               |              |                            |              |                            |                                                            |                                       |              |                                      |         |
| Yes                                  | 43.2         | 41 (30, 59)                | 44.5         | 46 (37, 65)                | <b>15.8 (2.9, 28.9)</b>                                    | <b>0.30</b>                           | <b>0.008</b> | -0.06                                | 0.61    |
| No                                   | 56.8         | 36 (26, 43)                | 55.5         | 34 (25, 46)                | -3.3 (-14.3, 7.5)                                          | -0.11                                 | 0.34         | -0.12                                | 0.29    |
| <b>Any Deductible or Coinsurance</b> |              |                            |              |                            |                                                            |                                       |              |                                      |         |
| Yes                                  | 54.3         | 42 (32, 62)                | 53.7         | 50 (39, 69)                | 15.0 (4.4, 28.9)                                           | <b>0.24</b>                           | <b>0.03</b>  | -0.07                                | 0.57    |
| No                                   | 45.7         | 34 (26, 41)                | 46.3         | 30 (25, 40)                | -3.3 (-17.2, 6.6)                                          | 0.01                                  | 0.95         | -0.07                                | 0.52    |

**Abbreviations:** IQR = Interquartile range; OOP = Out-of-Pocket

\* In the high-deductible plan subgroups, 2 outlier drugs (Palbociclib and Ponatinib) were excluded from correlation analyses because the change in out-of-pocket spending from 2015 to 2017 exceeded 500%.

**Legend:** The first 4 columns show the percent of patients in each subgroup and the median out-of-pocket spending for each drug among patients in that subgroup, weighted by drug utilization. All spending figures are in 2017 US dollars and represent the median spending for a 30-day drug supply among the given cohort. The next column shows the relative change in out-of-pocket spending from 2015 to 2017 among each subgroup. The final 4 columns show the correlation between change in drug list/net prices and out-of-pocket spending. Significant correlations ( $p < 0.05$ ) are bolded.

**eTable 3: Drug Prices and Out-of-Pocket Spending, Excluding Drugs with Higher Net than List Price Estimates in Any Quarter**

|                               | <b>Unweighted</b>                                 |                                                         |                                                   |
|-------------------------------|---------------------------------------------------|---------------------------------------------------------|---------------------------------------------------|
|                               | <b>2015 Price per 30-day Supply; median (IQR)</b> | <b>2017 Price per 30-day Supply (USD); median (IQR)</b> | <b>Percent Change, 2015 to 2017; median (IQR)</b> |
| <b>List Price</b>             | 453 (273, 2236)                                   | 537 (328, 2589)                                         | 17.7 (12.8, 24.1)                                 |
| <b>Net Price</b>              | 268 (166, 1397)                                   | 236 (169, 1643)                                         | 6.3 (-3.7, 16.9)                                  |
| <b>Out-of-Pocket Spending</b> | 38 (29, 49)                                       | 40 (30, 54)                                             | 5.3 (-1.3, 14.3)                                  |
|                               | <b>Weighted by Drug Use</b>                       |                                                         |                                                   |
| <b>List Price</b>             | 333 (229, 346)                                    | 385 (271, 390)                                          | 16.7 (13.6, 21.1)                                 |
| <b>Net Price</b>              | 173 (128, 223)                                    | 166 (144, 219)                                          | 2.7 (-3.9, 11.2)                                  |
| <b>Out-of-Pocket Spending</b> | 29 (26, 43)                                       | 30 (26, 45)                                             | 3.5 (1.4, 9.1)                                    |

**Abbreviations:** IQR = Interquartile Range

**Legend:** All prices represent the cost of a 30-day drug supply and are in 2017 US dollars. Results are weighted by drug use, defined as the number of 30-day supplies dispensed in the US in 2015 and 2017.

**eTable 4: Changes in Out-of-Pocket Spending and Correlation with Changes in Drug Prices, Excluding Drugs with Higher Net than List Price Estimates in Any Quarter**

| Subgroup                             | 2015         |                                     | 2017         |                                     | Percent Change in OOP Spending, 2015 to 2017, weighted median (IQR) | Weighted Correlation with Change in List Price |                  | Weighted Correlation with Change in Net Price |         |
|--------------------------------------|--------------|-------------------------------------|--------------|-------------------------------------|---------------------------------------------------------------------|------------------------------------------------|------------------|-----------------------------------------------|---------|
|                                      | Patients (%) | OOP Spending; Weighted Median (IQR) | Patients (%) | OOP Spending; Weighted Median (IQR) |                                                                     | r                                              | P-value          | r                                             | P-Value |
| <b>All Patients</b>                  | 100          | 29 (26, 43)                         | 100          | 30 (26, 45)                         | 3.5 (1.4, 9.1)                                                      | 0.14                                           | 0.29             | 0.03                                          | 0.82    |
| <b>High Deductible Plan*</b>         |              |                                     |              |                                     |                                                                     |                                                |                  |                                               |         |
| Yes                                  | 12.7         | 55 (51, 66)                         | 16.7         | 56 (43, 65)                         | -3.3 (-6.2, 8.9)                                                    | <b>0.47</b>                                    | <b>&lt;0.001</b> | 0.20                                          | 0.13    |
| No                                   | 87.3         | 28 (24, 40)                         | 83.3         | 28 (25, 42)                         | 2.9 (1.3, 9.1)                                                      | 0.06                                           | 0.67             | 0.00                                          | 0.98    |
| <b>Any Drug Deductible</b>           |              |                                     |              |                                     |                                                                     |                                                |                  |                                               |         |
| Yes                                  | 23.3         | 48 (36, 62)                         | 24.5         | 52 (40, 69)                         | 17.5 (9.9, 22.5)                                                    | <b>0.27</b>                                    | <b>0.04</b>      | 0.17                                          | 0.19    |
| No                                   | 76.7         | 26 (23, 38)                         | 75.5         | 26 (25, 40)                         | 1.3 (-1.1, 9.9)                                                     | -0.07                                          | 0.63             | -0.12                                         | 0.35    |
| <b>Any Coinsurance</b>               |              |                                     |              |                                     |                                                                     |                                                |                  |                                               |         |
| Yes                                  | 43.2         | 33 (28, 52)                         | 44.4         | 38 (30, 53)                         | 15.8 (8.6, 27.5)                                                    | <b>0.38</b>                                    | <b>0.003</b>     | -0.00                                         | 0.97    |
| No                                   | 56.8         | 26 (26, 38)                         | 55.6         | 25 (24, 38)                         | -0.8 (-3.3, 1.9)                                                    | -0.05                                          | 0.72             | -0.06                                         | 0.65    |
| <b>Any Deductible or Coinsurance</b> |              |                                     |              |                                     |                                                                     |                                                |                  |                                               |         |
| Yes                                  | 54.3         | 34 (28, 54)                         | 53.6         | 40 (30, 55)                         | 15.0 (8.4, 23.2)                                                    | <b>0.40</b>                                    | <b>0.002</b>     | 0.05                                          | 0.71    |
| No                                   | 45.7         | 26 (24, 36)                         | 46.4         | 25 (23, 35)                         | -3.3 (-3.3, 5.0)                                                    | -0.11                                          | 0.40             | -0.10                                         | 0.43    |

**Abbreviations:** IQR = Interquartile range; OOP = Out-of-Pocket

\* In the high-deductible plan subgroups, 2 outlier drugs (palbociclib and ponatinib) were excluded from correlation analyses because the change in out-of-pocket spending from 2015 to 2017 exceeded 500%.

**Legend:** The first 4 columns show the percent of patients in each subgroup and the median out-of-pocket spending for each drug among patients in that subgroup, weighted by drug utilization. All spending figures are in 2017 US dollars and represent the median spending for a 30-day drug supply among the given cohort. The next column shows the relative change in out-of-pocket spending from 2015 to 2017 among each subgroup. The final 4 columns show the correlation between change in drug list/net prices and out-of-pocket spending. Significant correlations ( $p < 0.05$ ) are bolded. In all subgroups, drugs are weighted by use.

**eFigure 2: Correlation between Drug Prices and Out-of-Pocket Spending, by High Deductible Insurance Plan**

**A. High Deductible Insurance Plan**

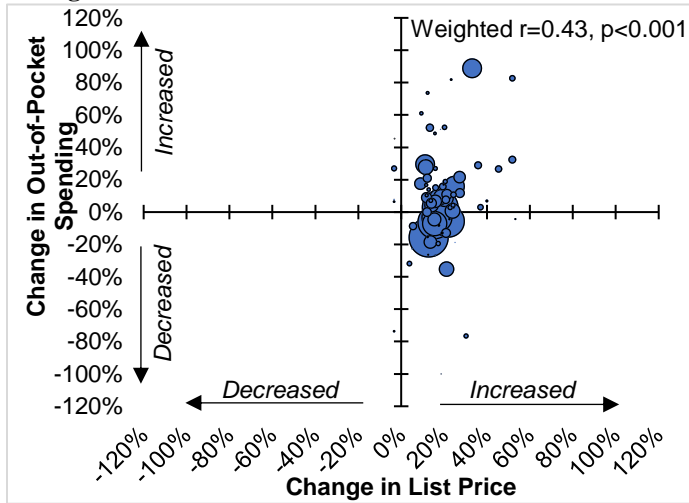

**B. Not High Deductible Insurance Plan**

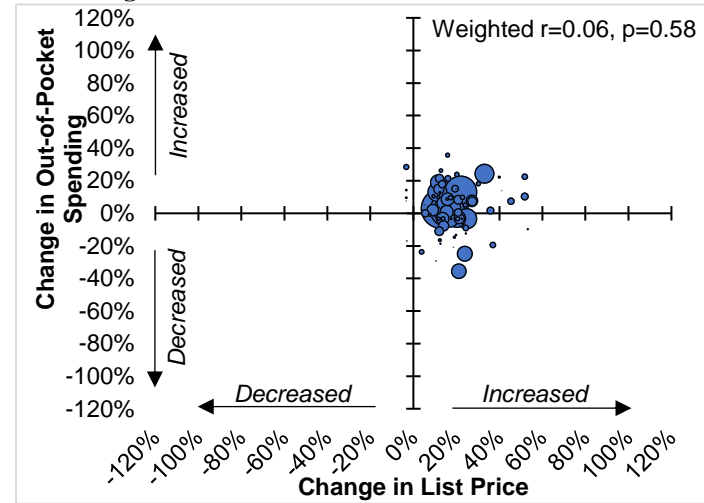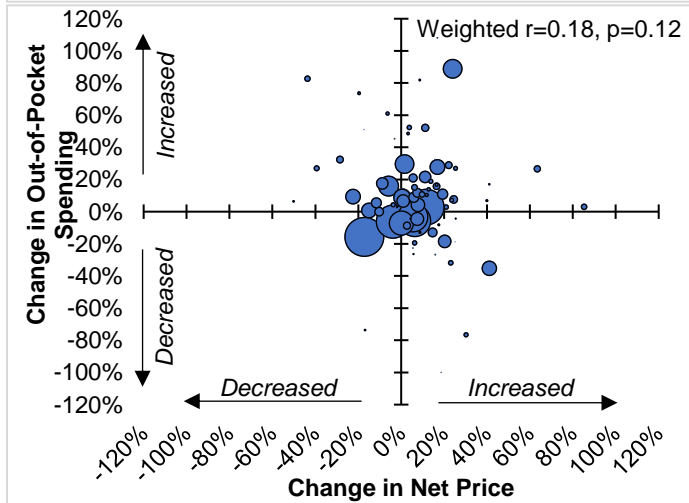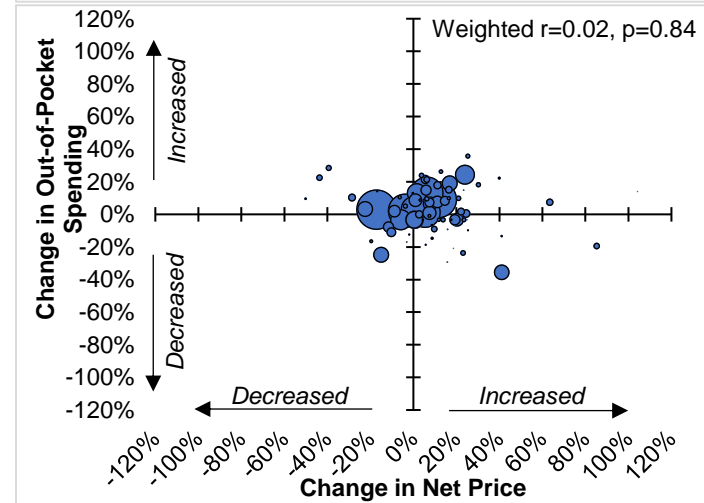

**Legend:** Each bubble represents one drug, with the area of the bubble proportional to the drug's use (number of 30-day supplies of the drug dispensed in the US in 2015 and 2017). The x-axis represents the change in list or net price, and the y-axis represents the median change in out-of-pocket spending from 2015 to 2017. Panel A includes patients with a high-deductible health plan, and Panel B includes patients without a high-deductible plan (B).



**eFigure 3: Correlation between Drug Prices and Out-of-Pocket Spending, by Deductible**

**A. Any Drug Deductible**

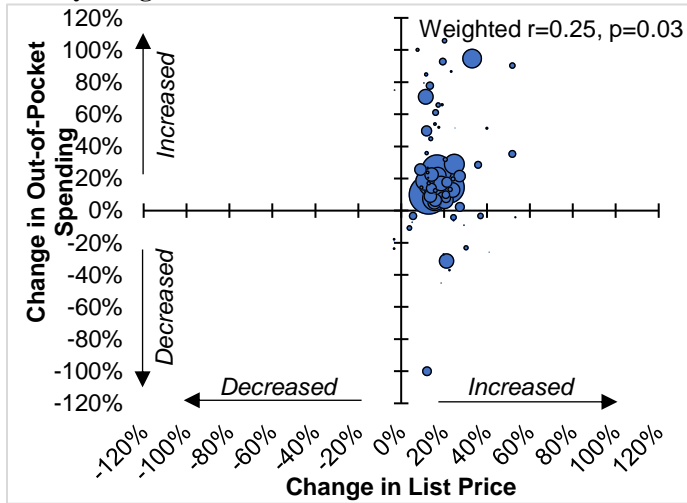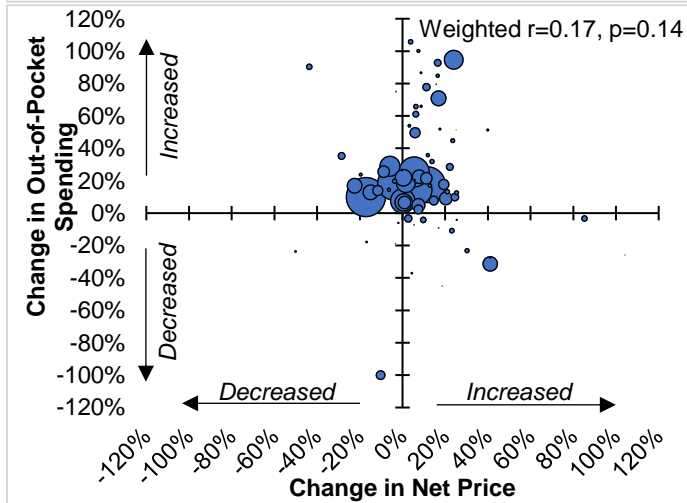

**B. No Drug Deductible**

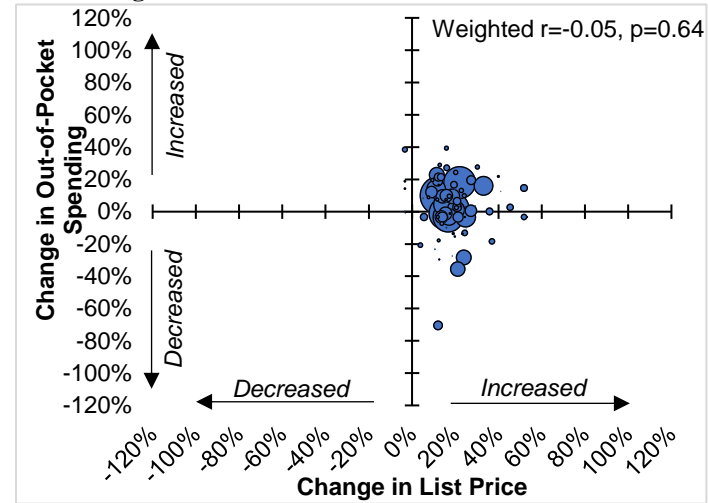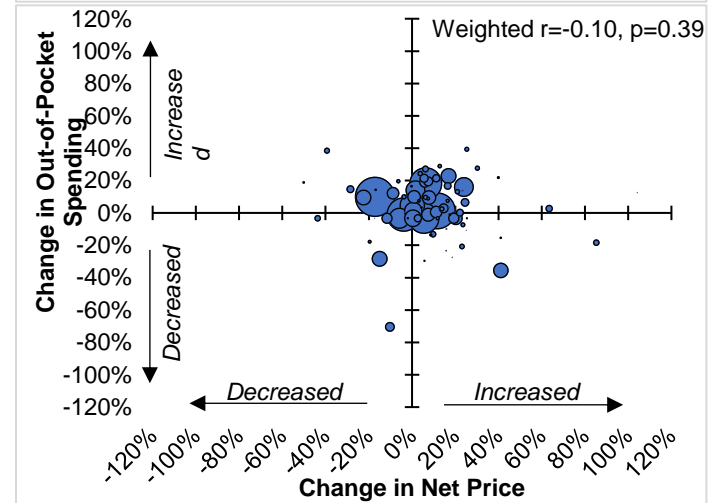

**Legend:** Each bubble represents one drug, with the area of the bubble proportional to the drug's use (number of 30-day supplies of the drug dispensed in the US in 2015 and 2017). The x-axis represents the change in list or net price, and the y-axis represents the median change in out-of-pocket spending from 2015 to 2017. Panel A includes patients with a drug deductible, and Panel B includes patients without any drug deductible.

**eFigure 4: Correlation between Drug Prices and Out-of-Pocket Spending, by Coinsurance**

**A. Any Drug Coinsurance**

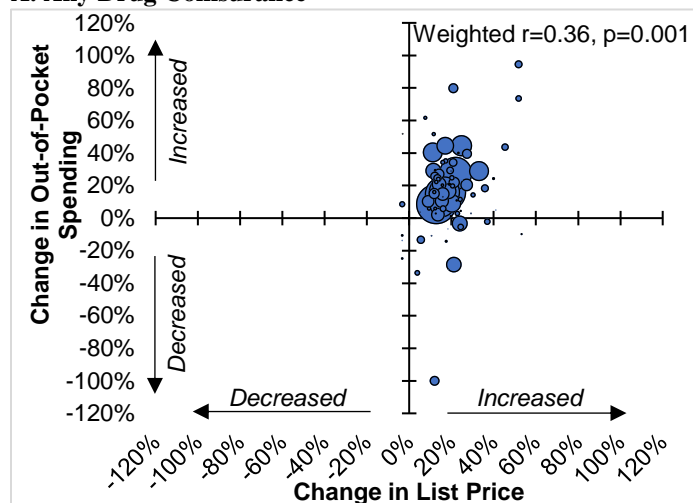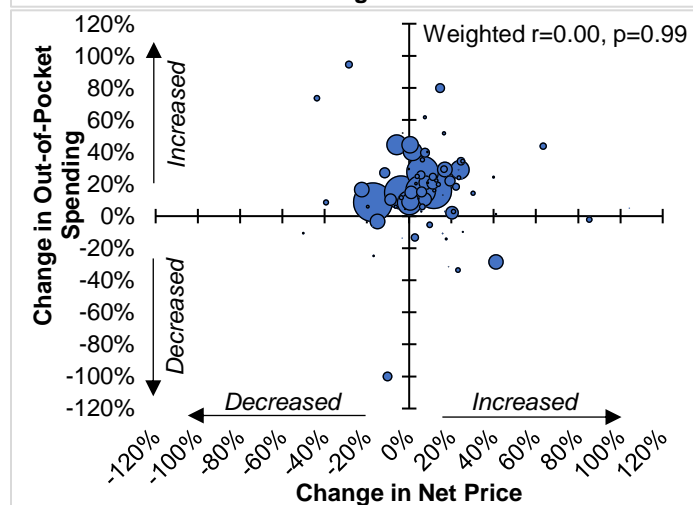

**B. No Drug Coinsurance**

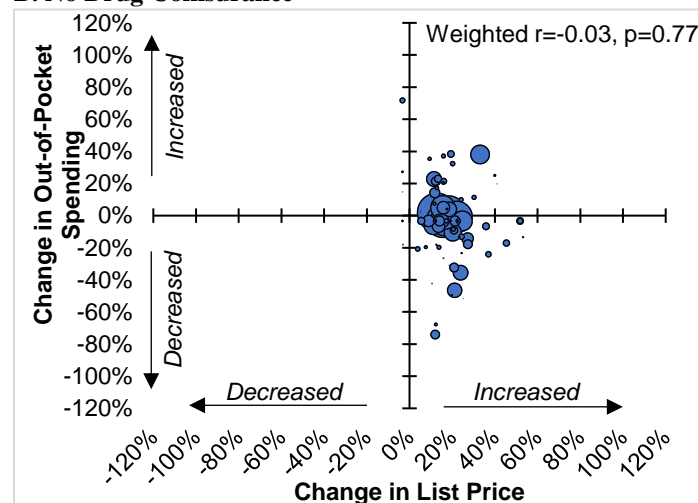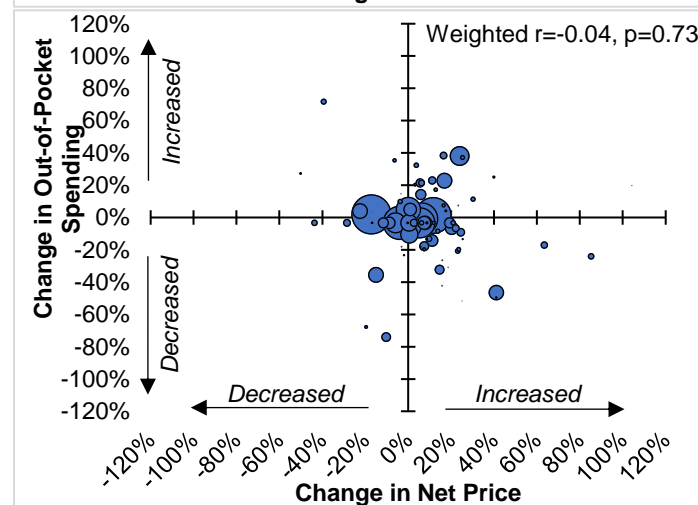

**Legend:** Each bubble represents one drug, with the area of the bubble proportional to the drug's use (number of 30-day supplies of the drug dispensed in the US in 2015 and 2017). The x-axis represents the change in list or net price, and the y-axis represents the median change in out-of-pocket spending from 2015 to 2017. Panel A includes patients with coinsurance, and Panel B includes patients without any coinsurance.
